# Supplementary material for: Overexpression of the transcription factor ATF3 with a regulatory molecular signature associates with the pathogenic development of colorectal cancer
Source: PubMed Central journal article supplement (PMC5564541; doi:10.18632/oncotarget.16638), 2017-03-29
Supplement: oncotarget-08-47020-s001.pdf [file oncotarget-08-47020-s001.pdf]

## Overexpression of the transcription factor ATF3 with a regulatory molecular signature associates with the pathogenic development of colorectal cancer

### SUPPLEMENTARY MATERIALS

#### Quantitative RT-PCR

Quantitative real-time PCR (qRT-PCR) analysis was carried out to detect the mRNA expression. Total RNA extraction from colon cancer cells was performed with Trizol Reagent (Invitrogen). Then, 2 µg of total

RNA was reverse-transcribed with high-capacity cDNA reverse transcription kits (Applied Biosystems, USA). The primers below were used to amplify ATF3, SPTBN2, DUSP14, CCNJL, CEACAM1, HLF, STC2, ULBP2, HDC, TOMM34, PARM1 and C2orf48. RT-PCR primers:

---

|          |                                    |
|----------|------------------------------------|
| ATF3:    | F: 5'- GAGGATTTTGCTAACCTGACACC-3'  |
|          | R: 5'- TTGACGGTAACTGACTCCAGC-3'    |
| SPTBN2:  | F: 5'-GAGGTCTCGCATTAAAGGCTCT-3'    |
|          | R: 5'-CTTTGGCAGTATCTCTCCCGA-3'     |
| DUSP14:  | F: 5'-TCAACTGGCCCCAATTTGAGT-3'     |
|          | R: 5'-CATCAGGTACGCGATACACAG-3'     |
| CCNJL:   | F: 5'-CCTGCGCGAGAAGGAACTG-3'       |
|          | R: 5'-CGTTGTAGCGATCCATGAAGTG-3'    |
| CEACAM1: | F: 5'-TGCTCTGATAGCAGTAGCCCT-3'     |
|          | R: 5'-TGCCGGTCTCCCGAAATG-3'        |
| HLF:     | F: 5'-CCACCTTTATCCCGCCTCC-3'       |
|          | R: 5'-TTTACTAAATGCGTCTTCGTGGT-3'   |
| STC2:    | F: 5'-ACAGGTTTCGGCTGCATAAGC-3'     |
|          | R: 5'-GAGGTCCACGTAGGGTTCG-3'       |
| ULBP2:   | F: 5'-AGCAACTGCGTGACATTCAG-3'      |
|          | R: 5'-GCCATCCTATACAGTCTCCCA-3'     |
| HDC:     | F: 5'-ATGCACGCCTACTACCCAG-3'       |
|          | R: 5'-CAGTCCATGACGTTTCATCTCC-3'    |
| TOMM34:  | F: 5'-AAGCCAGAGTTCTGAAGGAAGAAGG-3' |
|          | R: 5'-AGCTTGAGGGCTTCTGTGCAGT-3'    |
| PARM1:   | F: 5'-GTACAGAGTCTGCCTACATCAGC-3'   |
|          | R: 5'-TGGAGAGCTAGTCCAGATGGT-3'     |
| C2orf48: | F: 5'-CAGTGTGCGGGGATGAGAAG-3'      |
|          | R: 5'-GGGGATTCCCTTTCAAGACGTA-3'    |

---

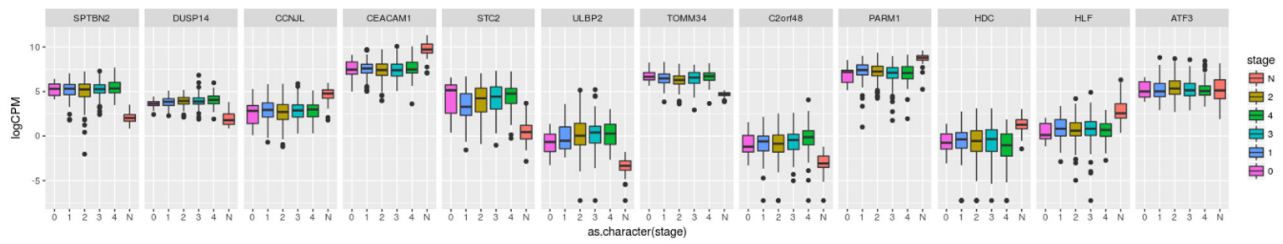

**Supplementary Figure 1: ATF3 target genes expression across different clinical stages.** Y-axis is the logCPM, x-axis is clinical stages (indicated by different colors)

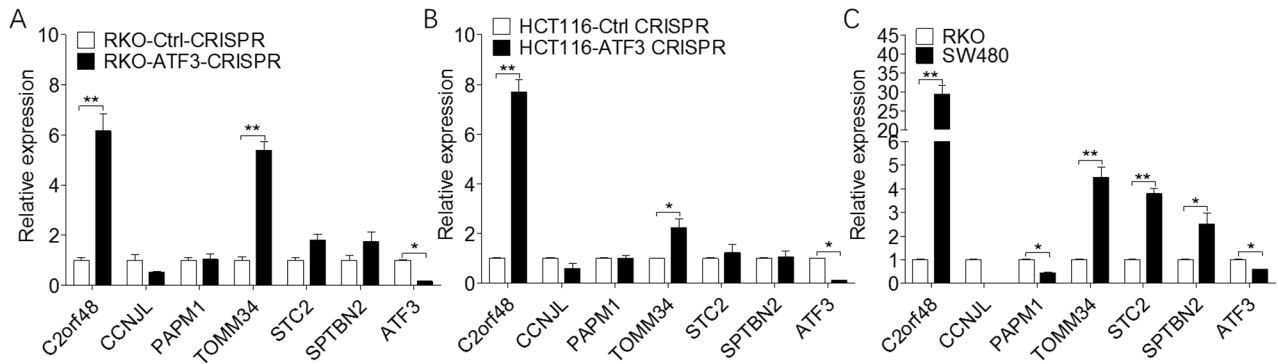

**Supplementary Figure 2: mRNA expression of different genes by qRT-PCR analysis.**

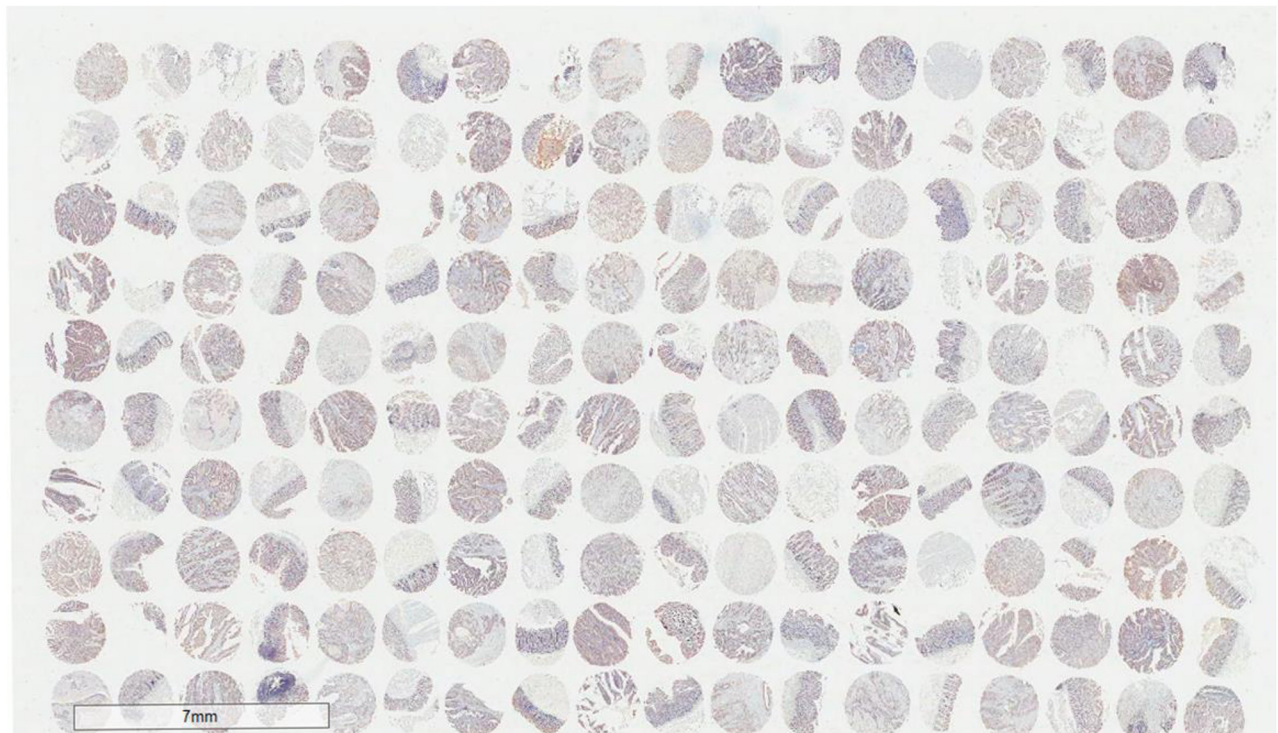

**Supplementary Figure 3: Scanning image of the whole slide by Aperio ScanScope slide scanner.**

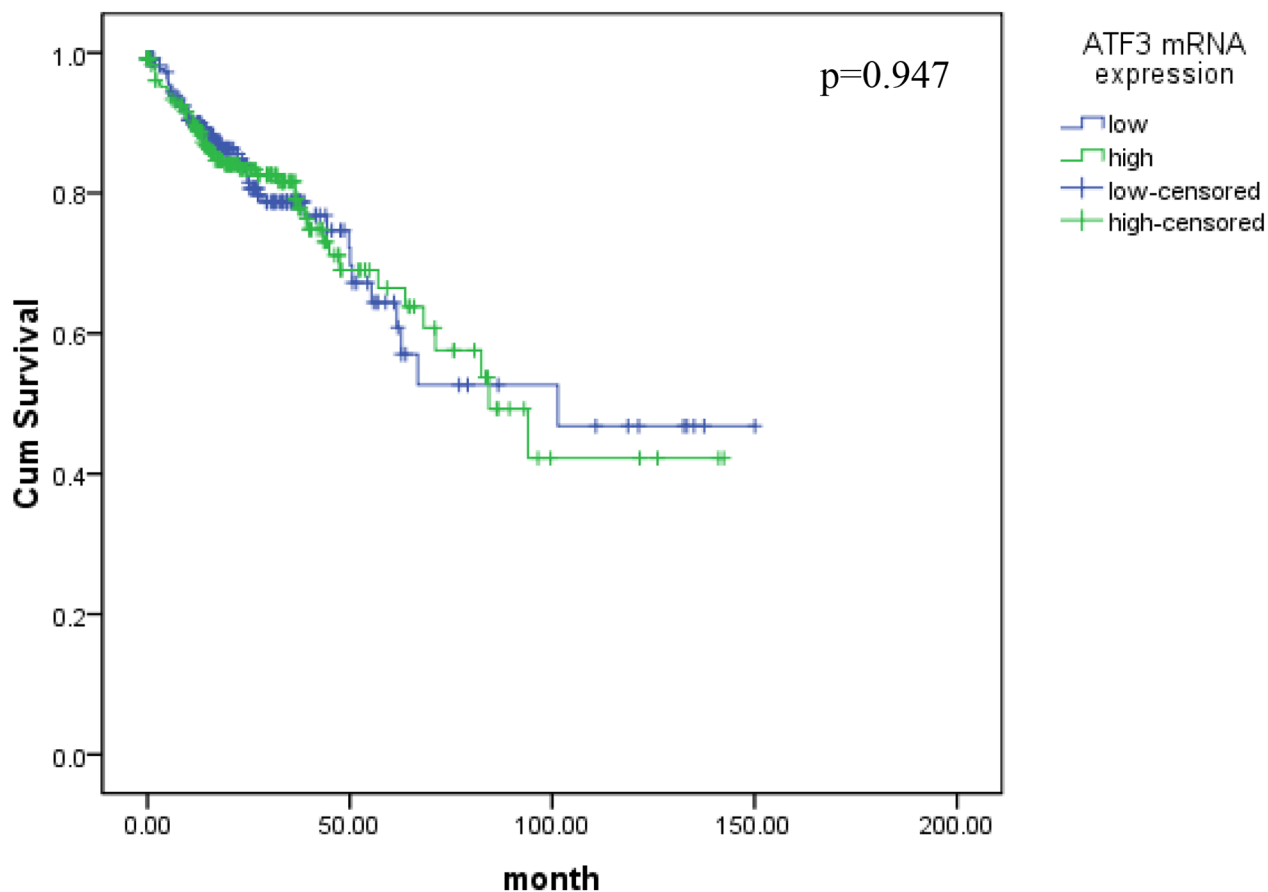

Supplementary Figure 4: Kaplan Meier curve for ATF3 mRNA expression from TCGA database.

Supplementary Table 1: Complete information of 47 genes from TCGA and ChIP-Seq data

See Supplementary File 1

Supplementary Table 2: ATF3 expression in CRC tumor tissues and adjacent normal tissues

|                   | CRC tumor tissues | Adjacent normal tissues | Pearson $\chi^2$ | p value |
|-------------------|-------------------|-------------------------|------------------|---------|
| ATF3 <sup>+</sup> | 23                | 0                       |                  |         |
| ATF3 <sup>-</sup> | 58                | 81                      |                  |         |
| Positive rate (%) | 23 (28.3%)        | 0 (0%)                  | 26.806           | <0.001* |

$\chi^2$  test for between-group analysis.

\*  $p < 0.05$  indicates statistical significance.
