# Supplementary material for: Overexpression of the transcription factor ATF3 with a regulatory molecular signature associates with the pathogenic development of colorectal cancer
Source: PubMed Central journal article supplement (PMC5564541; doi:10.18632/oncotarget.16638), 2017-03-29
Supplement: oncotarget-08-47020-s002.pdf [file oncotarget-08-47020-s002.pdf]

## Overexpression of the transcription factor ATF3 with a regulatory molecular signature associates with the pathogenic development of colorectal cancer

Supplementary Table 1. Complete information of 47 genes from TCGA and ChIP-Seq data

| Gene Symbol | Entrezid  | Chr   | Male      |           |          |           | Female     |            |          |           | Distance.to.TSS | p.value-survival | comments |
|-------------|-----------|-------|-----------|-----------|----------|-----------|------------|------------|----------|-----------|-----------------|------------------|----------|
|             |           |       | logFC     | AveExpr   | P.Value  | adj.P.Val | logFC      | AveExpr    | P.Value  | adj.P.Val |                 |                  |          |
| NPY6R       | 4888      | chr5  | -5.353874 | -2.302335 | 1.53E-34 | 2.20E-32  | -5.7417409 | -2.3023349 | 5.20E-46 | 1.40E-43  | 32438           | 0.002            |          |
| PCOLCE2     | 26577     | chr3  | -4.405367 | -1.032092 | 1.60E-26 | 1.45E-24  | -4.5505777 | -1.0320918 | 2.83E-29 | 3.07E-27  | -7185           | 0.002            |          |
| NLGN1       | 22871     | chr3  | -4.296365 | -3.285662 | 4.92E-31 | 5.90E-29  | -3.8350618 | -3.2856622 | 3.72E-23 | 2.87E-21  | -61991          | 0.023            |          |
| WDR78       | 79819     | chr1  | -2.232263 | 1.4526828 | 2.25E-11 | 6.18E-10  | -2.5910948 | 1.45268283 | 3.67E-19 | 2.07E-17  | 57226           | 0.027            | INTRON   |
| B3GNT6      | 192134    | chr11 | -4.426439 | 1.4926097 | 9.58E-13 | 3.08E-11  | -4.9030286 | 1.49260974 | 3.96E-16 | 1.67E-14  | -18508          | 0.012            |          |
| SPTBN2      | 6712      | chr11 | 2.9693281 | 4.8952155 | 2.58E-10 | 6.27E-09  | 2.96550493 | 4.89521555 | 1.21E-10 | 2.97E-09  | 1031            | 0.045            |          |
| DUSP14      | 11072     | chr17 | 1.4875704 | 3.764131  | 0.001909 | 0.01688   | 2.16291873 | 3.76413099 | 1.46E-10 | 3.52E-09  | -888            | 0.042            |          |
| CCNJL       | 79616     | chr5  | -1.57743  | 2.9131861 | 0.003564 | 0.02944   | -2.2672314 | 2.91318605 | 3.91E-10 | 8.99E-09  | -3561           | 0.046            |          |
| CEACAM1     | 634       | chr19 | -2.198474 | 7.6232836 | 2.28E-06 | 3.45E-05  | -2.578757  | 7.62328357 | 7.72E-10 | 1.74E-08  | -2968           | 0.019            |          |
| VAT1L       | 57687     | chr16 | -2.579783 | 0.8015917 | 3.13E-15 | 1.28E-13  | -2.229431  | 0.80159172 | 8.66E-10 | 1.94E-08  | 89389           | 0.042            | INTRON   |
| ZBTB7C      | 201501    | chr18 | -2.863384 | 3.739254  | 6.63E-08 | 1.25E-06  | -3.0163186 | 3.739254   | 3.89E-09 | 8.11E-08  | -64144          | 0.019            |          |
| NAT2        | 10        | chr8  | -2.126481 | 1.8604587 | 2.57E-05 | 0.00033   | -2.4803398 | 1.86045865 | 8.48E-09 | 1.69E-07  | 35258           | 0.036            |          |
| ARNTL2      | 56938     | chr12 | 2.1845062 | 4.4464967 | 1.88E-06 | 2.89E-05  | 2.45242276 | 4.44649668 | 1.25E-08 | 2.46E-07  | 285             | 0.043            |          |
| SIGLEC1     | 6614      | chr20 | -2.214853 | 2.4120399 | 3.70E-06 | 5.43E-05  | -2.4034977 | 2.41203987 | 2.17E-08 | 4.14E-07  | -9192           | 0.047            |          |
| ELFN1-AS1   | 101927125 | NA    | 4.4322997 | 2.0992975 | 1.21E-07 | 2.22E-06  | 4.53104358 | 2.09929747 | 2.80E-08 | 5.27E-07  | 319             | 0.009            | NO MAP   |
| EIF4E3      | 317649    | chr3  | -1.931843 | 4.313934  | 8.14E-07 | 1.32E-05  | -2.0144012 | 4.313934   | 5.83E-08 | 1.05E-06  | 651             | 0.034            |          |
| CNN1        | 1264      | chr19 | -4.070283 | 4.4898023 | 1.12E-13 | 4.00E-12  | -3.072749  | 4.48980229 | 9.02E-08 | 1.58E-06  | -2533           | 0.007            |          |
| TLR10       | 81793     | chr4  | -2.646391 | -0.981597 | 6.92E-09 | 1.45E-07  | -2.4876992 | -0.9815971 | 1.12E-07 | 1.95E-06  | 24823           | 0.036            |          |
| SPEG        | 10290     | chr2  | -3.124376 | 1.7152555 | 5.04E-14 | 1.85E-12  | -2.4554688 | 1.7152555  | 2.44E-07 | 4.00E-06  | -7727           | 0.009            |          |
| HLF         | 3131      | chr17 | -2.281261 | 0.8936062 | 1.11E-09 | 2.53E-08  | -2.0433738 | 0.89360622 | 9.45E-07 | 1.42E-05  | -102608         | 0.016            |          |
| STC2        | 8614      | chr5  | 3.2839862 | 3.7588117 | 2.47E-05 | 0.00032   | 3.76721921 | 3.75881175 | 1.15E-06 | 1.70E-05  | -351            | 0.047            |          |
| ULBP2       | 80328     | chr6  | 3.4528277 | -0.049079 | 8.58E-06 | 0.00012   | 3.52613126 | -0.0490794 | 1.98E-06 | 2.82E-05  | -7493           | 0.005            |          |
| PCDH9       | 5101      | chr13 | -2.625792 | -1.266862 | 4.23E-08 | 8.10E-07  | -2.3995051 | -1.2668625 | 2.44E-06 | 3.42E-05  | 110642          | 0.03             |          |
| ATOH1       | 474       | chr4  | -2.891656 | 2.7942974 | 1.14E-05 | 0.00015   | -2.9467636 | 2.79429741 | 4.09E-06 | 5.56E-05  | -650467         | 0.008            |          |
| ATP8B1      | 5205      | chr18 | -1.599663 | 7.4251985 | 0.00015  | 0.00167   | -1.7318411 | 7.42519845 | 4.61E-06 | 6.22E-05  | -17117          | 0.008            |          |
| SMOX        | 54498     | chr20 | 2.1145197 | 4.2872456 | 8.10E-06 | 0.00011   | 2.1229295  | 4.28724561 | 6.19E-06 | 8.19E-05  | -12301          | 0.008            |          |
| HDC         | 3067      | chr15 | -1.924886 | -0.47529  | 0.000853 | 0.00813   | -2.1443704 | -0.4752898 | 3.53E-05 | 0.000419  | 7901            | 0.017            | INTRON   |
| STK31       | 56164     | chr7  | 3.0791919 | 0.7862269 | 2.45E-05 | 0.00032   | 3.00922849 | 0.78622686 | 3.59E-05 | 0.000425  | 154886          | 0.048            |          |
| TNFAIP8L3   | 388121    | chr15 | -1.816902 | 1.3121712 | 4.52E-05 | 0.00056   | -1.7822138 | 1.3121712  | 7.82E-05 | 0.000876  | -16006          | 0.011            |          |
| FCRL5       | 83416     | chr1  | -2.654324 | 0.9017842 | 6.09E-06 | 8.67E-05  | -2.4423437 | 0.90178418 | 9.47E-05 | 0.00104   | 56257           | 0.032            |          |
| KIF14       | 9928      | chr1  | 1.8946204 | 3.2770271 | 6.70E-05 | 0.0008    | 1.85582922 | 3.27702713 | 9.82E-05 | 0.001075  | -19414          | 0.049            |          |
| CXCL8       | 3576      | chr4  | 4.1240086 | 5.2281824 | 1.12E-05 | 0.00015   | 3.45706307 | 5.22818238 | 0.000125 | 0.001338  | -35759          | 0.002            |          |
| TOMM34      | 10953     | chr20 | 1.6442229 | 6.3006993 | 0.000138 | 0.00156   | 1.5984586  | 6.30069927 | 0.000277 | 0.002768  | -93             | 0.027            |          |
| FENDDR      | 400550    | chr16 | -2.39868  | 3.113129  | 3.69E-08 | 7.13E-07  | -1.8894581 | 3.11312904 | 0.000287 | 0.002844  | 29177           | 0.03             | INTRON   |
| GLDN        | 342035    | chr15 | -2.156141 | 0.3656588 | 3.12E-06 | 4.65E-05  | -1.8887583 | 0.36565884 | 0.000316 | 0.00312   | 108632          | 0.003            |          |
| RIMS3       | 9783      | chr1  | -1.764196 | 2.4025066 | 0.000376 | 0.00387   | -1.7424555 | 2.40250665 | 0.000395 | 0.003824  | 19063           | 0.018            | INTRON   |
| CKAP2L      | 150468    | chr2  | 1.5734772 | 3.7951892 | 0.000896 | 0.0085    | 1.58374538 | 3.79518922 | 0.00059  | 0.005513  | 27479           | 0.024            |          |
| MELK        | 9833      | chr9  | 1.479857  | 4.782172  | 0.00214  | 0.01867   | 1.52658801 | 4.78217203 | 0.000651 | 0.006034  | 12617           | 0.043            |          |
| MPP2        | 4355      | chr17 | -2.270673 | 0.3716658 | 5.18E-11 | 1.39E-09  | -1.6489736 | 0.37166577 | 0.000665 | 0.00615   | 1176            | 0                |          |
| C2orf48     | 348738    | chr2  | 2.1623021 | -0.839182 | 0.00122  | 0.01121   | 2.18648862 | -0.8391819 | 0.000897 | 0.008071  | -5185           | 0.02             |          |
| SFRP2       | 6423      | chr4  | -2.699162 | 4.1099248 | 0.001609 | 0.01446   | -2.7379806 | 4.1099248  | 0.00112  | 0.009857  | -41556          | 0.05             |          |
| SPTBN4      | 57731     | chr19 | -1.901826 | -1.223642 | 0.000199 | 0.00216   | -1.7349929 | -1.2236416 | 0.001912 | 0.01603   | -1092           | 0.01             |          |

|             |        |       |           |           |          |         |            |            |          |          |         |       |        |
|-------------|--------|-------|-----------|-----------|----------|---------|------------|------------|----------|----------|---------|-------|--------|
| MAD2L1      | 4085   | chr4  | 1.4956752 | 5.4226633 | 0.003826 | 0.03136 | 1.52019743 | 5.42266334 | 0.002205 | 0.018239 | -262720 | 0.041 |        |
| SERTAD4     | 56256  | chr1  | -2.073672 | 1.5507117 | 1.03E-05 | 0.00014 | -1.7193806 | 1.55071166 | 0.002305 | 0.018984 | -44416  | 0.036 |        |
| DTNA        | 1837   | chr18 | -2.250072 | 1.2587594 | 1.01E-05 | 0.00014 | -1.8616094 | 1.25875937 | 0.002423 | 0.019835 | -2366   | 0.019 |        |
| MIR4435-2HG | 541471 | chr2  | 1.5928041 | 3.7391011 | 0.000329 | 0.00343 | 1.46872645 | 3.73910112 | 0.002465 | 0.020114 | 15      | 0.038 | NO MAP |
| PARM1       | 25849  | chr4  | -1.682999 | 7.2208161 | 0.003938 | 0.03214 | -1.698484  | 7.22081608 | 0.002919 | 0.023278 | -198    | 0.031 |        |
